# Supplementary material
Source: Elsevier journal article supplement (https://www.sciencedirect.com/science/article/pii/S0325754121001024)
Supplement: mmc1 [file S0325754121001024:mmc1.doc]

**Supplementary table S1**: Quantification of indole-3-acetic acid and phosphate solubilization of isolates.

| S.no. | Bacterial Isolates | IAA µg/ml | PS µg/ml |
| --- | --- | --- | --- |
| 1 | M11 | 121.8 | ------ |
| 2 | M33 | 106 | ------ |
| 3 | M35 | 143.7 | 25.6 |
| 4 | M40 | 65.4 | 31.2 |
| 5 | M42 | 120.5 | ------ |
| 6 | W71 | 43.2 | 30.9 |
| 7 | W75 | 87.9 | 28.7 |
| 8 | W79 | 11.3 | 41.2 |
| 9 | W88 | 39.7 | ------ |
| 10 | P92 | 54.6 | ------ |
| 11 | P97 | 129.5 | ------ |
| 12 | P102 | 58.9 | ------ |
| 13 | P107 | 71 | ------ |
| 14 | P110 | 96.7 | ------ |

Results were quantified by colorimetric method using standard curve of IAA and P-solubilization.
